# Supplementary material for: Hybrid nanotubes constructed by confining Ti0.95Nb0.95O4 quantum dots in porous bamboo-like CNTs: superior anode materials for boosting lithium storage
Source: Royal Society of Chemistry journal article supplement (doi:10.1039/d3dt01880f), 2023-01-01
Supplement: d3dt01880f1.pdf [file d3dt01880f1.pdf]

**Hybrid nanotubes constructed by confining  $\text{Ti}_{0.95}\text{Nb}_{0.95}\text{O}_4$  quantum dots in porous bamboo-like CNTs: Superior anode materials for boosting lithium storage**

Yakun Tang, Wenjie Ma, Yue Zhang, Sen Dong, Chensong Yang and Lang Liu\*

State Key Laboratory of Chemistry and Utilization of Carbon Based Energy Resources; College of Chemistry, Xinjiang University, Urumqi, 830017, Xinjiang, PR China.

Email: [liulang@xju.edu.cn](mailto:liulang@xju.edu.cn)

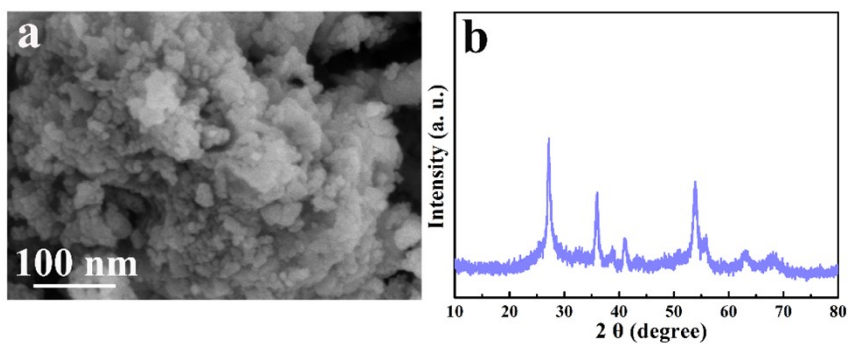

Fig. S1 SEM (a) and XRD pattern (b) of B-TN.

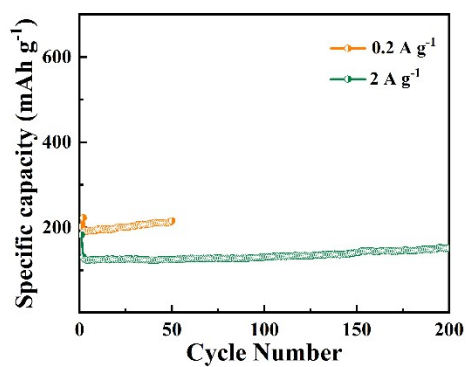

Fig. S2 cycle performances at 0.2 A g<sup>-1</sup> and 2 A g<sup>-1</sup> of B-TN.

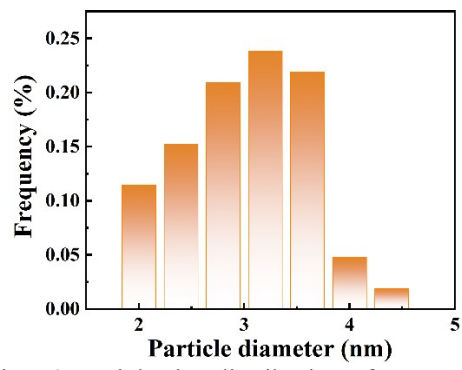

Fig. S3 particle size distribution of TN QDs.

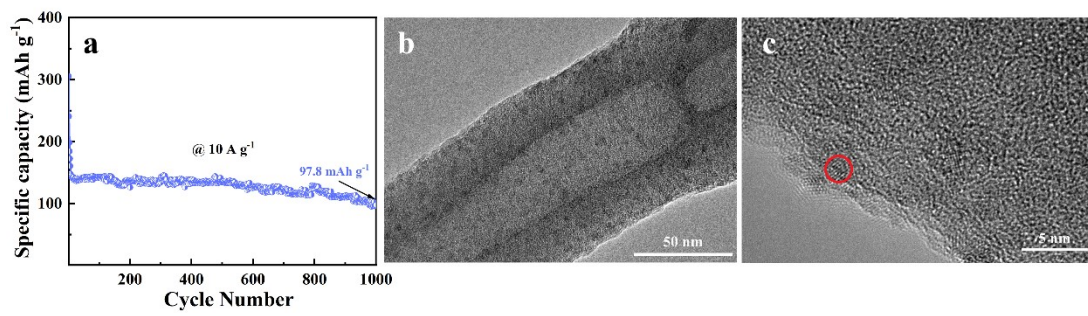

Fig. S4 cycle performances at  $10 \text{ A g}^{-1}$  of TN (a), TEM (b) and HRTEM (c) images after 1000 cycles.
